# Supplementary material for: Why does solvent treatment increase the conductivity of PEDOT : PSS? Insight from molecular dynamics simulations
Source: Royal Society of Chemistry journal article supplement (doi:10.1039/d2cp02655d), 2022-01-01
Supplement: d2cp02655d2.pdf [file d2cp02655d2.pdf]

## Supplementary Information

### **Why does solvent treatment increase conductivity of PEDOT:PSS? Insight from molecular dynamics simulations**

Mohsen Modarresi,<sup>1,2</sup> and Igor Zozoulenko<sup>2\*</sup>

<sup>1</sup>Department of Physics, Faculty of Science, Ferdowsi University of Mashhad, Mashhad, Iran.

<sup>2</sup>Laboratory of Organic Electronics, ITN, Linköping University, 60174 Norrköping, Sweden.

\*Corresponding author: [igor.zozoulenko@liu.se](mailto:igor.zozoulenko@liu.se)

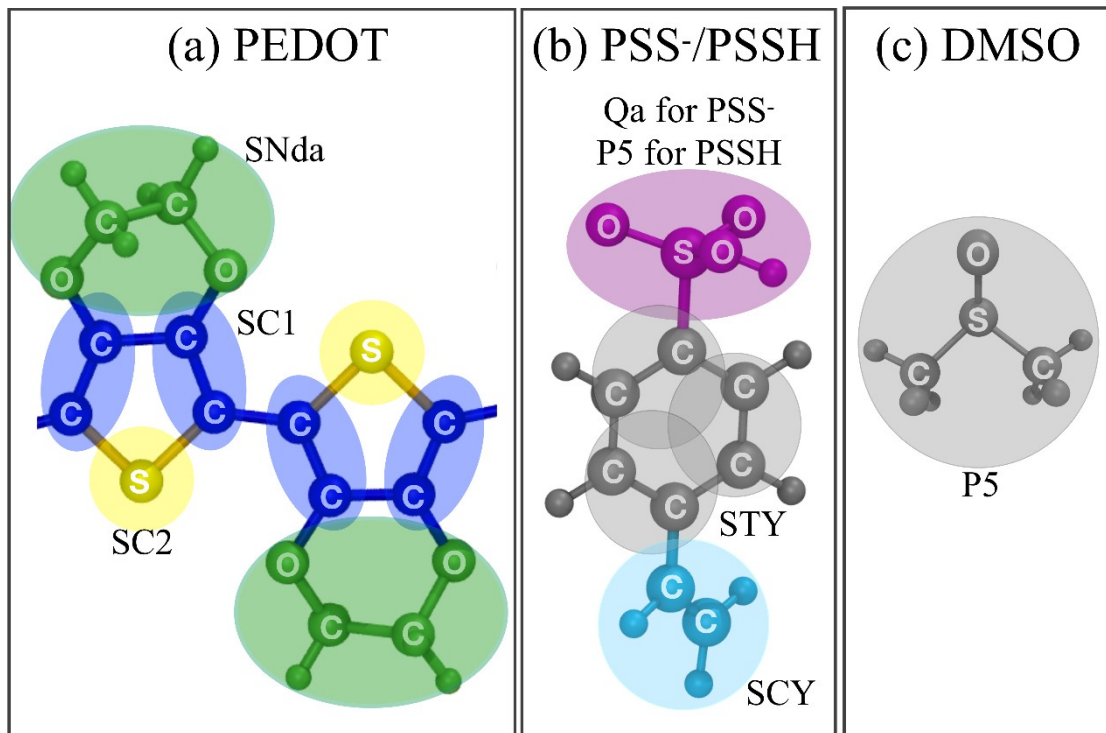

**Figure S1:** MARTINI coarse grained models for (a) PEDOT, (b) PSS<sup>-</sup> and PSSH and (c) DMSO used in the present work, where Martini beads are indicated.

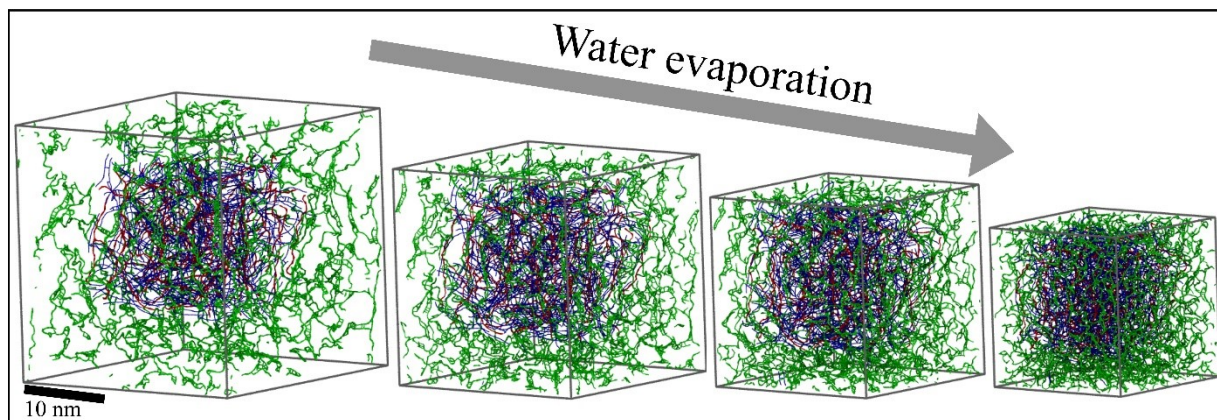

**Figure S2:** Illustration of the preparation of the dry PEDOT:PSS film from the initial water solution. Here PEDOT, PSS<sup>-</sup> and PSSH are shown in blue, red and green, respectively.

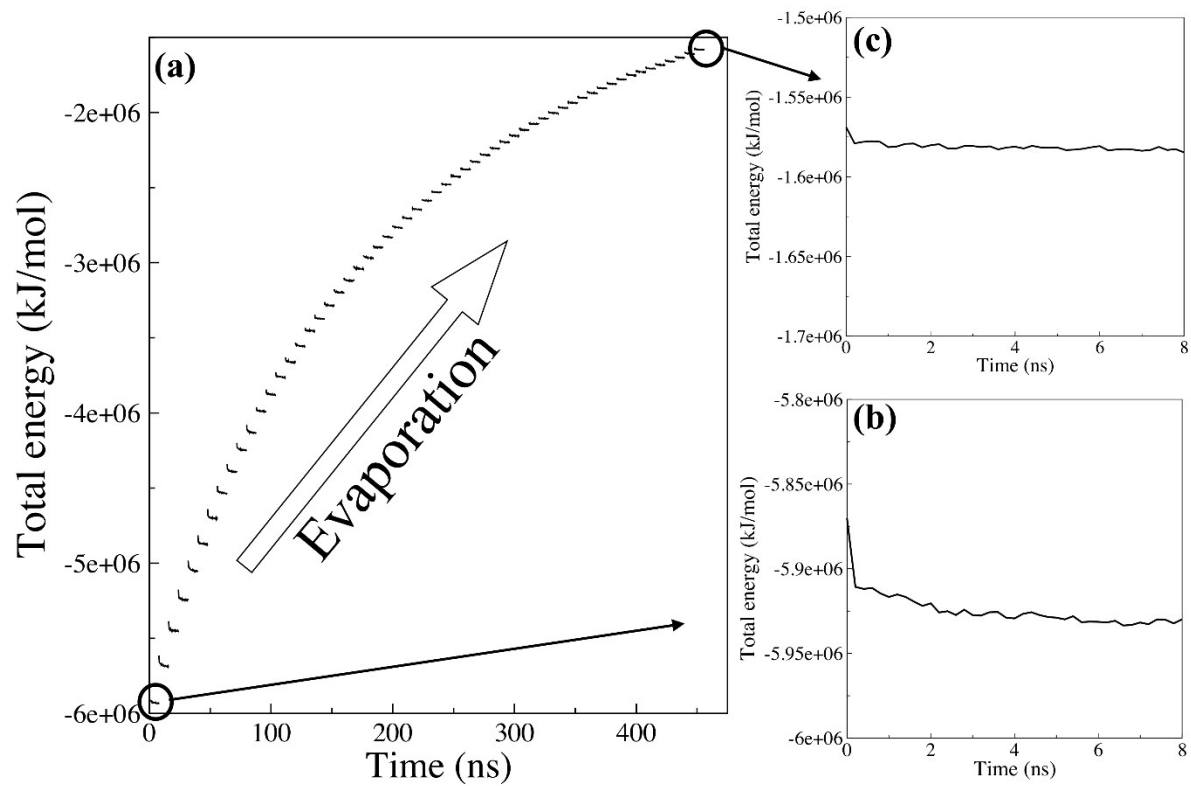

**Figure S3:** (a) Evolution of the total energy during water evaporation. (b),(c) zoom-in of the first and last steps respectively.

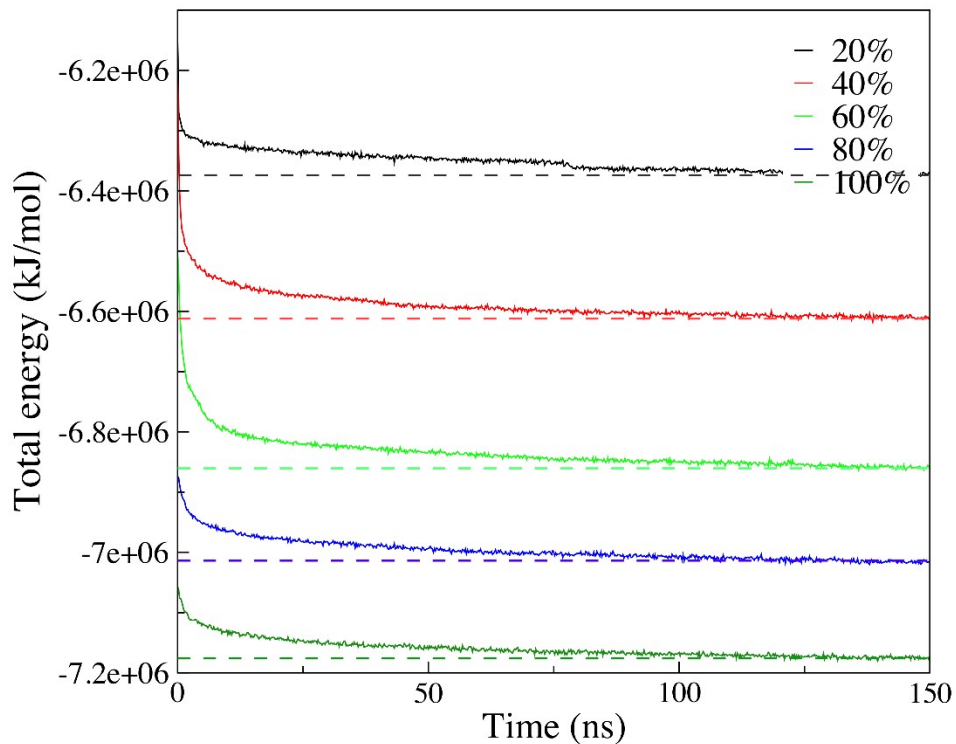

**Figure S4:** Evolution of the total energy during deprotonation.

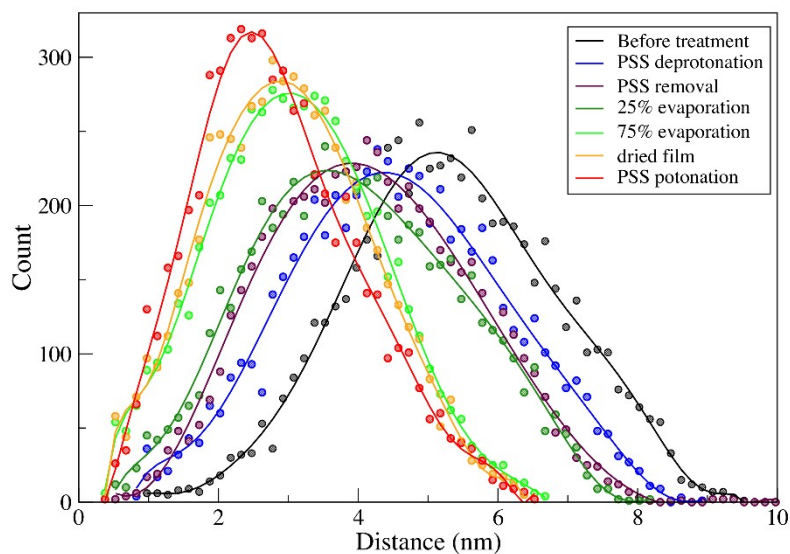

**Figure S5:** The statistical analysis of minimum distance between PEDOT chains belonging to two different cores during solvent treatment. Note that the black and red curves are the same as in Fig. 3b.

**Table S1:** Composition of the computational box for the preparation of the initial dry film.

| Molecule                      | Number of chains | Chain length | Number of monomers/<br>sulfonate groups | charges                                                                                        | Total charge |
|-------------------------------|------------------|--------------|-----------------------------------------|------------------------------------------------------------------------------------------------|--------------|
| PEDOT                         | 500              | 12           | $500 \times 12 = 6000$                  | One charge per 3 monomers                                                                      | $+2000e$     |
| PSS<br>(in PEDOT-rich region) | 63               | 50           | $63 \times 50 = 3150$                   | $-0.635e$ per sulfonate group, i.e. approximately 2/3 sulfonate groups of PSS are deprotonated | $-2000e$     |
| PSSH<br>(in PSS-rich region)  | 217              | 50           | $217 \times 50 = 10850$                 | 0                                                                                              | 0            |

**Table S2:** Content of the computational box during preparation of the thin film

| Step              | PEDOT chains/ | protonated sulphonate groups |                 | De-protonated sulphonate groups |                 | water                  | Na+ | Protocol key point<br>NPT ensemble (T=300 K and P=1 atm)                                                                |
|-------------------|---------------|------------------------------|-----------------|---------------------------------|-----------------|------------------------|-----|-------------------------------------------------------------------------------------------------------------------------|
|                   |               | PEDOT-rich region            | PSS-rich region | PEDOT-rich region               | PSS-rich region |                        |     |                                                                                                                         |
| Initial solution  | 500           | 1150                         | 10850           | 2000                            | 0               | 136060                 | 0   | 50 ns equilibration with polymer position restraints, 150 ns MD simulation                                              |
| Water evaporation | 500           | 1150                         | 10850           | 2000                            | 0               | $136060 \rightarrow 0$ | 0   | Water is evaporated gradually with 1.25 % step, 4 ns equilibration with polymer position restraints, 8 ns MD simulation |

**Table S3:** Content of the computational box during solvent treatment

| Step                     | PEDOT chains | protonated sulphonate groups |                 | De-protonated sulphonate groups |                 | DMSO       | Na+          | Protocol key point<br>NPT ensemble (T=300 K and P=1 atm)                                                               |
|--------------------------|--------------|------------------------------|-----------------|---------------------------------|-----------------|------------|--------------|------------------------------------------------------------------------------------------------------------------------|
|                          |              | PEDOT - rich region          | PSS-rich region | PEDOT-rich region               | PSS-rich region |            |              |                                                                                                                        |
| Immersing film into DMSO | 500          | 1150                         | 10850           | 2000                            | 0               | 117665     | 0            | 50 ns equilibration with polymer position restraints, 250 ns MD simulation                                             |
| PSS deprotonation        | 500          | 1150 → 0                     | 10850 → 0       | 2000 → 3150                     | 0 → 10850       | 117665     | 0 → 12000    | In 5 steps, 50 ns equilibration with polymer position restraints, 150 ns MD simulation                                 |
| Removal of detached PSS  | 500          | 0                            | 0               | 3150                            | 10850 → 5050    | 117665     | 12000 → 8200 | In 3 steps, 50 ns equilibration with polymer position restraints, 150 ns MD simulation                                 |
| DMSO evaporation         | 500          | 0                            | 0               | 3150                            | 5050            | 117665 → 0 | 8200         | DMSO is evaporated gradually with 1.25 % step, 4 ns equilibration with polymer position restraints, 8 ns MD simulation |
| PSS protonation          | 500          | 0 → 1150                     | 0 → 5050        | 3150 → 2000                     | 5050 → 0        | 0          | 8200 → 0     | 50 ns equilibration with polymer position restraints, 150 ns MD simulation                                             |

**Table S4:** Input files for the initial PEDOT:PSS solution

| No | File name             | File description                                                    |
|----|-----------------------|---------------------------------------------------------------------|
| 1  | initial.gro           | Initial geometry file                                               |
| 2  | DMSO.itp              | DMSO topology file                                                  |
| 3  | PEDOT12.itp           | PEDOT topology file                                                 |
| 4  | PSSH.itp              | PSSH chains topology file                                           |
| 5  | PSSmix.itp            | PSS-/PSSH chains topology file                                      |
| 6  | martini_v2.0_ions.itp | Martini force field file for ions                                   |
| 7  | martini_v2.2P_PS.itp  | General Martini force field file                                    |
| 8  | top.top               | Topology file                                                       |
| 9  | posreP.itp            | Position restraints file for PEDOT chains                           |
| 10 | posrePSS.itp          | Position restraints file for PSS chains                             |
| 11 | eq.mdp                | Equilibration input file with position restraints on polymer chains |
| 12 | md.mdp                | Production run input file                                           |
